# Supplementary material for: Disparities in high fasting plasma glucose-related cardiovascular disease burden in China
Source: PubMed Central journal article supplement — Nat Commun. 2024 Oct 11;15:8817. doi: 10.1038/s41467-024-53236-y (PMC11470015; doi:10.1038/s41467-024-53236-y), 2024-10-11
Supplement: 41467_2024_53236_MOESM3_ESM.pdf [file 41467_2024_53236_MOESM3_ESM.pdf]

## **Description of Additional Supplementary Files**

File Name: Supplementary Data 1

Description: Mean fasting plasma glucose by sex and by age in 2010 and 2018 for all provinces.
