# Supplementary material for: Disparities in high fasting plasma glucose-related cardiovascular disease burden in China
Source: PubMed Central journal article supplement — Nat Commun. 2024 Oct 11;15:8817. doi: 10.1038/s41467-024-53236-y (PMC11470015; doi:10.1038/s41467-024-53236-y), 2024-10-11
Supplement: 41467_2024_53236_MOESM4_ESM.pdf [file 41467_2024_53236_MOESM4_ESM.pdf]

Mean fasting plasma glucose (95% UI) by sex and by age in 2010 and 2018 for all provinces (mmol/L).

|         | Age, years       | 2010               |                    | 2018               |                    |
|---------|------------------|--------------------|--------------------|--------------------|--------------------|
|         |                  | Male               | Female             | Male               | Female             |
| Anhui   | 25-29            | 5.43(4.70 to 6.16) | 5.27(4.63 to 5.90) | 5.62(4.98 to 6.26) | 5.45(4.89 to 6.01) |
|         | 30-34            | 5.47(4.75 to 6.19) | 5.32(4.69 to 5.95) | 5.66(5.03 to 6.29) | 5.44(4.88 to 6.00) |
|         | 35-39            | 5.62(4.91 to 6.33) | 5.40(4.77 to 6.03) | 5.81(5.18 to 6.43) | 5.56(5.00 to 6.12) |
|         | 40-44            | 5.76(5.06 to 6.47) | 5.56(4.95 to 6.17) | 5.98(5.36 to 6.61) | 5.77(5.22 to 6.31) |
|         | 45-49            | 5.86(5.15 to 6.57) | 5.67(5.04 to 6.29) | 6.09(5.46 to 6.71) | 5.78(5.23 to 6.34) |
|         | 50-54            | 5.87(5.17 to 6.58) | 5.77(5.14 to 6.39) | 6.17(5.54 to 6.79) | 5.97(5.41 to 6.52) |
|         | 55-59            | 5.91(5.21 to 6.62) | 5.86(5.24 to 6.48) | 6.10(5.48 to 6.72) | 6.11(5.56 to 6.66) |
|         | 60-64            | 5.98(5.27 to 6.68) | 6.00(5.38 to 6.62) | 6.09(5.47 to 6.71) | 6.26(5.70 to 6.81) |
|         | 65-69            | 5.98(5.27 to 6.69) | 6.12(5.49 to 6.74) | 6.17(5.55 to 6.78) | 6.30(5.74 to 6.85) |
|         | 70-74            | 5.99(5.28 to 6.70) | 6.07(5.45 to 6.69) | 6.11(5.49 to 6.72) | 6.22(5.67 to 6.78) |
|         | 75-79            | 5.85(5.15 to 6.56) | 5.92(5.29 to 6.55) | 6.02(5.40 to 6.63) | 6.20(5.64 to 6.76) |
|         | 80-              | 5.15(4.42 to 5.89) | 5.18(4.53 to 5.84) | 5.00(4.37 to 5.63) | 5.53(4.95 to 6.10) |
|         | Age-standardised | 5.73(5.01 to 6.44) | 5.61(4.99 to 6.23) | 5.92(5.29 to 6.54) | 5.79(5.24 to 6.35) |
| Beijing | 25-29            | 5.80(5.06 to 6.54) | 5.49(4.84 to 6.14) | 5.87(5.16 to 6.58) | 5.48(4.91 to 6.05) |
|         | 30-34            | 5.80(5.06 to 6.53) | 5.60(4.95 to 6.25) | 5.90(5.26 to 6.53) | 5.61(5.05 to 6.17) |
|         | 35-39            | 5.95(5.22 to 6.69) | 5.67(5.02 to 6.32) | 6.12(5.49 to 6.75) | 5.86(5.30 to 6.42) |
|         | 40-44            | 6.07(5.33 to 6.81) | 5.77(5.12 to 6.42) | 6.33(5.70 to 6.96) | 5.84(5.28 to 6.40) |
|         | 45-49            | 6.18(5.44 to 6.92) | 5.93(5.28 to 6.57) | 6.45(5.81 to 7.08) | 6.03(5.47 to 6.60) |
|         | 50-54            | 6.24(5.50 to 6.98) | 6.06(5.41 to 6.71) | 6.49(5.84 to 7.13) | 6.15(5.58 to 6.72) |
|         | 55-59            | 6.28(5.54 to 7.01) | 6.19(5.55 to 6.84) | 6.58(5.94 to 7.22) | 6.32(5.75 to 6.89) |
|         | 60-64            | 6.40(5.67 to 7.14) | 6.39(5.75 to 7.04) | 6.56(5.92 to 7.20) | 6.53(5.96 to 7.10) |
|         | 65-69            | 6.38(5.64 to 7.11) | 6.46(5.81 to 7.11) | 6.73(6.10 to 7.37) | 6.57(6.00 to 7.14) |
|         | 70-74            | 6.39(5.65 to 7.13) | 6.46(5.81 to 7.11) | 6.61(5.98 to 7.24) | 6.64(6.07 to 7.21) |
|         | 75-79            | 6.23(5.49 to 6.97) | 6.25(5.60 to 6.90) | 6.40(5.70 to 7.10) | 6.44(5.86 to 7.01) |
|         | 80-              | 5.56(4.80 to 6.31) | 5.56(4.90 to 6.22) | 5.57(4.82 to 6.31) | 5.83(5.18 to 6.49) |
|         | Age-standardised | 6.08(5.34 to 6.82) | 5.89(5.25 to 6.54) | 6.28(5.63 to 6.92) | 5.99(5.42 to 6.56) |
| Fujian  | 25-29            | 5.41(4.70 to 6.12) | 5.19(4.56 to 5.81) | 5.52(4.89 to 6.16) | 5.34(4.78 to 5.90) |
|         | 30-34            | 5.46(4.75 to 6.17) | 5.23(4.61 to 5.85) | 5.55(4.92 to 6.18) | 5.39(4.83 to 5.95) |
|         | 35-39            | 5.57(4.87 to 6.27) | 5.32(4.70 to 5.94) | 5.85(5.22 to 6.48) | 5.48(4.92 to 6.04) |
|         | 40-44            | 5.72(5.02 to 6.42) | 5.47(4.85 to 6.08) | 5.87(5.24 to 6.50) | 5.65(5.09 to 6.22) |
|         | 45-49            | 5.87(5.17 to 6.58) | 5.59(4.97 to 6.21) | 6.04(5.41 to 6.67) | 5.77(5.21 to 6.34) |
|         | 50-54            | 5.90(5.20 to 6.61) | 5.70(5.08 to 6.32) | 6.06(5.42 to 6.69) | 5.92(5.35 to 6.48) |
|         | 55-59            | 5.92(5.21 to 6.62) | 5.82(5.20 to 6.44) | 6.14(5.51 to 6.78) | 6.07(5.51 to 6.64) |
|         | 60-64            | 5.96(5.26 to 6.67) | 5.96(5.34 to 6.58) | 6.21(5.58 to 6.85) | 6.18(5.62 to 6.74) |

|           | Age, years       | 2010               |                    | 2018               |                    |
|-----------|------------------|--------------------|--------------------|--------------------|--------------------|
|           |                  | Male               | Female             | Male               | Female             |
|           | 65-69            | 5.96(5.25 to 6.66) | 5.99(5.36 to 6.62) | 6.22(5.59 to 6.86) | 6.34(5.78 to 6.90) |
|           | 70-74            | 6.01(5.29 to 6.72) | 6.01(5.40 to 6.63) | 6.33(5.70 to 6.97) | 6.34(5.78 to 6.90) |
|           | 75-79            | 5.97(5.22 to 6.72) | 5.92(5.28 to 6.56) | 6.03(5.40 to 6.67) | 6.23(5.67 to 6.79) |
|           | 80-              | 5.16(4.39 to 5.93) | 5.16(4.49 to 5.84) | 5.36(4.71 to 6.01) | 5.55(4.98 to 6.12) |
|           | Age-standardised | 5.72(5.01 to 6.43) | 5.54(4.91 to 6.16) | 5.90(5.27 to 6.53) | 5.74(5.18 to 6.31) |
| Gansu     | 25-29            | 5.18(4.48 to 5.87) | 4.93(4.32 to 5.54) | 5.36(4.75 to 5.97) | 5.19(4.64 to 5.74) |
|           | 30-34            | 5.18(4.49 to 5.87) | 4.99(4.38 to 5.60) | 5.36(4.74 to 5.97) | 5.34(4.79 to 5.90) |
|           | 35-39            | 5.28(4.59 to 5.97) | 5.05(4.44 to 5.67) | 5.50(4.89 to 6.11) | 5.34(4.80 to 5.89) |
|           | 40-44            | 5.37(4.68 to 6.06) | 5.18(4.56 to 5.79) | 5.57(4.96 to 6.17) | 5.43(4.89 to 5.97) |
|           | 45-49            | 5.49(4.79 to 6.19) | 5.24(4.63 to 5.85) | 5.72(5.11 to 6.33) | 5.52(4.98 to 6.06) |
|           | 50-54            | 5.53(4.83 to 6.22) | 5.37(4.76 to 5.99) | 5.86(5.25 to 6.47) | 5.64(5.10 to 6.18) |
|           | 55-59            | 5.56(4.86 to 6.25) | 5.48(4.87 to 6.10) | 5.76(5.15 to 6.37) | 5.78(5.23 to 6.32) |
|           | 60-64            | 5.52(4.82 to 6.21) | 5.67(5.05 to 6.28) | 5.99(5.38 to 6.61) | 5.93(5.39 to 6.48) |
|           | 65-69            | 5.65(4.96 to 6.35) | 5.72(5.10 to 6.34) | 5.91(5.30 to 6.53) | 6.03(5.48 to 6.58) |
|           | 70-74            | 5.67(4.96 to 6.37) | 5.75(5.12 to 6.37) | 5.91(5.29 to 6.53) | 6.01(5.45 to 6.57) |
|           | 75-79            | 5.57(4.86 to 6.28) | 5.60(4.97 to 6.23) | 5.73(5.11 to 6.35) | 5.90(5.32 to 6.49) |
|           | 80-              | 4.76(4.03 to 5.48) | 4.89(4.23 to 5.55) | 5.19(4.45 to 5.93) | 5.14(4.48 to 5.80) |
|           |                  | Age-standardised   | 5.38(4.69 to 6.08) | 5.25(4.63 to 5.86) | 5.62(5.01 to 6.24) |
| Guangdong | 25-29            | 5.48(4.75 to 6.21) | 5.29(4.64 to 5.93) | 5.57(4.93 to 6.20) | 5.31(4.75 to 5.87) |
|           | 30-34            | 5.50(4.77 to 6.23) | 5.35(4.70 to 5.99) | 5.63(4.99 to 6.26) | 5.38(4.82 to 5.94) |
|           | 35-39            | 5.69(4.96 to 6.42) | 5.45(4.81 to 6.09) | 5.73(5.11 to 6.35) | 5.51(4.95 to 6.06) |
|           | 40-44            | 5.78(5.05 to 6.50) | 5.55(4.92 to 6.19) | 5.85(5.23 to 6.46) | 5.66(5.11 to 6.21) |
|           | 45-49            | 5.92(5.21 to 6.64) | 5.70(5.07 to 6.33) | 6.02(5.40 to 6.64) | 5.77(5.21 to 6.32) |
|           | 50-54            | 5.95(5.24 to 6.66) | 5.77(5.14 to 6.39) | 6.07(5.46 to 6.69) | 5.92(5.37 to 6.47) |
|           | 55-59            | 5.99(5.28 to 6.70) | 5.88(5.25 to 6.51) | 6.18(5.57 to 6.79) | 6.06(5.51 to 6.61) |
|           | 60-64            | 6.07(5.35 to 6.78) | 6.04(5.41 to 6.67) | 6.17(5.56 to 6.78) | 6.17(5.62 to 6.72) |
|           | 65-69            | 6.12(5.41 to 6.84) | 6.11(5.48 to 6.74) | 6.16(5.55 to 6.78) | 6.33(5.78 to 6.88) |
|           | 70-74            | 6.07(5.36 to 6.78) | 6.13(5.51 to 6.75) | 6.19(5.58 to 6.81) | 6.29(5.74 to 6.83) |
|           | 75-79            | 5.92(5.22 to 6.63) | 5.92(5.30 to 6.53) | 6.05(5.44 to 6.66) | 6.13(5.58 to 6.67) |
|           | 80-              | 5.36(4.63 to 6.09) | 5.26(4.62 to 5.90) | 5.42(4.78 to 6.05) | 5.64(5.09 to 6.20) |
|           |                  | Age-standardised   | 5.79(5.07 to 6.51) | 5.63(5.00 to 6.27) | 5.89(5.27 to 6.51) |
| Guangxi   | 25-29            | 5.38(4.70 to 6.06) | 5.14(4.54 to 5.75) | 5.50(4.90 to 6.10) | 5.44(4.91 to 5.97) |
|           | 30-34            | 5.45(4.78 to 6.13) | 5.22(4.62 to 5.82) | 5.62(5.03 to 6.21) | 5.46(4.93 to 5.99) |
|           | 35-39            | 5.56(4.89 to 6.24) | 5.30(4.71 to 5.90) | 5.75(5.16 to 6.34) | 5.59(5.06 to 6.12) |
|           | 40-44            | 5.69(5.02 to 6.37) | 5.40(4.80 to 6.00) | 5.87(5.28 to 6.46) | 5.66(5.13 to 6.19) |

|         | Age, years       | 2010               |                    | 2018               |                    |
|---------|------------------|--------------------|--------------------|--------------------|--------------------|
|         |                  | Male               | Female             | Male               | Female             |
|         | 45-49            | 5.83(5.15 to 6.50) | 5.52(4.92 to 6.11) | 5.96(5.37 to 6.55) | 5.72(5.19 to 6.25) |
|         | 50-54            | 5.86(5.18 to 6.53) | 5.61(5.01 to 6.20) | 6.10(5.51 to 6.69) | 5.85(5.32 to 6.38) |
|         | 55-59            | 5.88(5.20 to 6.55) | 5.75(5.15 to 6.35) | 6.13(5.54 to 6.72) | 6.00(5.47 to 6.53) |
|         | 60-64            | 5.96(5.28 to 6.63) | 5.84(5.25 to 6.44) | 6.17(5.58 to 6.76) | 6.07(5.54 to 6.60) |
|         | 65-69            | 6.01(5.33 to 6.68) | 5.93(5.33 to 6.53) | 6.13(5.55 to 6.72) | 6.20(5.67 to 6.73) |
|         | 70-74            | 6.06(5.38 to 6.74) | 5.96(5.37 to 6.56) | 6.14(5.55 to 6.72) | 6.20(5.67 to 6.73) |
|         | 75-79            | 5.91(5.22 to 6.59) | 5.77(5.15 to 6.39) | 6.01(5.42 to 6.60) | 6.04(5.51 to 6.57) |
|         | 80-              | 5.07(4.35 to 5.80) | 5.02(4.40 to 5.65) | 5.04(4.45 to 5.63) | 5.20(4.63 to 5.77) |
|         | Age-standardised | 5.70(5.02 to 6.37) | 5.48(4.88 to 6.08) | 5.86(5.27 to 6.45) | 5.73(5.20 to 6.26) |
| Guizhou | 25-29            | 5.04(4.32 to 5.75) | 4.88(4.25 to 5.51) | 5.25(4.54 to 5.95) | 5.04(4.43 to 5.65) |
|         | 30-34            | 5.08(4.36 to 5.79) | 4.94(4.31 to 5.57) | 5.23(4.54 to 5.92) | 5.15(4.54 to 5.75) |
|         | 35-39            | 5.24(4.53 to 5.95) | 5.03(4.40 to 5.65) | 5.39(4.70 to 6.07) | 5.21(4.60 to 5.81) |
|         | 40-44            | 5.37(4.66 to 6.08) | 5.16(4.53 to 5.78) | 5.53(4.85 to 6.22) | 5.31(4.71 to 5.92) |
|         | 45-49            | 5.49(4.78 to 6.20) | 5.26(4.63 to 5.88) | 5.64(4.95 to 6.32) | 5.43(4.82 to 6.03) |
|         | 50-54            | 5.47(4.75 to 6.19) | 5.32(4.69 to 5.95) | 5.71(5.02 to 6.40) | 5.54(4.93 to 6.15) |
|         | 55-59            | 5.52(4.81 to 6.23) | 5.40(4.77 to 6.02) | 5.70(5.01 to 6.38) | 5.66(5.05 to 6.27) |
|         | 60-64            | 5.53(4.82 to 6.24) | 5.48(4.86 to 6.11) | 5.73(5.04 to 6.41) | 5.73(5.13 to 6.34) |
|         | 65-69            | 5.63(4.92 to 6.34) | 5.63(5.00 to 6.26) | 5.77(5.08 to 6.45) | 5.79(5.18 to 6.40) |
|         | 70-74            | 5.58(4.86 to 6.30) | 5.79(5.15 to 6.42) | 5.72(5.03 to 6.41) | 5.91(5.30 to 6.52) |
|         | 75-79            | 5.61(4.90 to 6.33) | 5.46(4.83 to 6.08) | 5.70(5.01 to 6.39) | 5.76(5.15 to 6.37) |
|         | 80-              | 4.77(4.00 to 5.53) | 4.79(4.15 to 5.44) | 5.05(4.35 to 5.74) | 5.03(4.42 to 5.65) |
|         | Age-standardised | 5.34(4.63 to 6.05) | 5.20(4.57 to 5.82) | 5.51(4.82 to 6.20) | 5.39(4.78 to 6.00) |
| Hainan  | 25-29            | 5.55(4.82 to 6.28) | 5.37(4.73 to 6.01) | 5.67(5.06 to 6.27) | 5.57(5.02 to 6.11) |
|         | 30-34            | 5.59(4.86 to 6.32) | 5.48(4.83 to 6.12) | 5.81(5.18 to 6.44) | 5.63(5.08 to 6.17) |
|         | 35-39            | 5.70(4.97 to 6.43) | 5.55(4.90 to 6.19) | 5.90(5.25 to 6.55) | 5.90(5.35 to 6.45) |
|         | 40-44            | 5.83(5.10 to 6.57) | 5.64(5.00 to 6.29) | 5.96(5.35 to 6.56) | 6.08(5.53 to 6.63) |
|         | 45-49            | 5.97(5.24 to 6.71) | 5.76(5.11 to 6.41) | 6.19(5.58 to 6.80) | 6.03(5.48 to 6.57) |
|         | 50-54            | 6.03(5.29 to 6.77) | 5.82(5.17 to 6.47) | 6.24(5.64 to 6.85) | 6.16(5.62 to 6.70) |
|         | 55-59            | 6.00(5.27 to 6.74) | 5.99(5.34 to 6.64) | 6.36(5.76 to 6.96) | 6.29(5.75 to 6.83) |
|         | 60-64            | 6.18(5.44 to 6.92) | 6.09(5.44 to 6.74) | 6.33(5.73 to 6.93) | 6.39(5.86 to 6.93) |
|         | 65-69            | 6.18(5.44 to 6.91) | 6.14(5.49 to 6.79) | 6.30(5.69 to 6.90) | 6.49(5.95 to 7.04) |
|         | 70-74            | 6.11(5.37 to 6.85) | 6.17(5.52 to 6.82) | 6.43(5.83 to 7.03) | 6.55(6.01 to 7.09) |
|         | 75-79            | 5.98(5.23 to 6.72) | 6.11(5.46 to 6.77) | 6.38(5.73 to 7.02) | 6.35(5.78 to 6.92) |
|         | 80-              | 5.31(4.54 to 6.08) | 5.38(4.71 to 6.06) | 5.56(4.92 to 6.19) | 5.87(5.30 to 6.44) |
|         | Age-standardised | 5.85(5.11 to 6.58) | 5.72(5.07 to 6.37) | 6.05(5.43 to 6.66) | 6.02(5.47 to 6.57) |

|              | Age, years | 2010               |                    | 2018               |                    |
|--------------|------------|--------------------|--------------------|--------------------|--------------------|
|              |            | Male               | Female             | Male               | Female             |
| Hebei        | 25-29      | 5.57(4.87 to 6.26) | 5.24(4.63 to 5.85) | 5.63(4.98 to 6.28) | 5.39(4.83 to 5.95) |
|              | 30-34      | 5.53(4.84 to 6.23) | 5.37(4.76 to 5.99) | 5.68(5.04 to 6.31) | 5.50(4.94 to 6.07) |
|              | 35-39      | 5.65(4.96 to 6.34) | 5.41(4.80 to 6.02) | 6.00(5.36 to 6.64) | 5.53(4.96 to 6.09) |
|              | 40-44      | 5.76(5.07 to 6.45) | 5.51(4.89 to 6.12) | 5.97(5.34 to 6.61) | 5.66(5.09 to 6.23) |
|              | 45-49      | 5.85(5.16 to 6.55) | 5.66(5.05 to 6.27) | 6.11(5.47 to 6.74) | 5.86(5.29 to 6.43) |
|              | 50-54      | 5.84(5.15 to 6.53) | 5.85(5.24 to 6.46) | 6.15(5.51 to 6.79) | 6.03(5.46 to 6.60) |
|              | 55-59      | 5.91(5.22 to 6.60) | 5.88(5.27 to 6.49) | 6.26(5.62 to 6.90) | 6.12(5.55 to 6.69) |
|              | 60-64      | 5.97(5.28 to 6.67) | 6.02(5.40 to 6.63) | 6.27(5.63 to 6.92) | 6.19(5.62 to 6.76) |
|              | 65-69      | 6.02(5.32 to 6.71) | 6.05(5.43 to 6.66) | 6.28(5.64 to 6.92) | 6.36(5.79 to 6.93) |
|              | 70-74      | 5.95(5.25 to 6.64) | 6.10(5.49 to 6.71) | 6.26(5.62 to 6.90) | 6.37(5.80 to 6.93) |
|              | 75-79      | 5.91(5.22 to 6.60) | 5.92(5.30 to 6.53) | 6.12(5.48 to 6.76) | 6.18(5.61 to 6.76) |
|              | 80-        | 5.17(4.45 to 5.89) | 5.20(4.57 to 5.82) | 5.49(4.84 to 6.13) | 5.39(4.80 to 5.98) |
|              |            | Age-standardised   | 5.75(5.06 to 6.45) | 5.61(5.00 to 6.23) | 6.00(5.35 to 6.64) |
| Henan        | 25-29      | 5.40(4.71 to 6.08) | 5.17(4.57 to 5.78) | 5.64(5.00 to 6.29) | 5.33(4.76 to 5.91) |
|              | 30-34      | 5.45(4.76 to 6.14) | 5.23(4.62 to 5.84) | 5.69(5.05 to 6.33) | 5.45(4.88 to 6.02) |
|              | 35-39      | 5.56(4.88 to 6.25) | 5.39(4.78 to 6.00) | 5.81(5.17 to 6.45) | 5.59(5.02 to 6.16) |
|              | 40-44      | 5.73(5.04 to 6.41) | 5.47(4.86 to 6.07) | 5.96(5.32 to 6.60) | 5.72(5.15 to 6.29) |
|              | 45-49      | 5.84(5.16 to 6.52) | 5.62(5.02 to 6.23) | 6.10(5.46 to 6.74) | 5.84(5.27 to 6.41) |
|              | 50-54      | 5.85(5.16 to 6.53) | 5.72(5.12 to 6.33) | 6.14(5.50 to 6.78) | 5.97(5.40 to 6.55) |
|              | 55-59      | 5.83(5.15 to 6.51) | 5.78(5.17 to 6.38) | 6.20(5.56 to 6.84) | 6.13(5.56 to 6.70) |
|              | 60-64      | 5.88(5.20 to 6.56) | 5.97(5.37 to 6.57) | 6.19(5.56 to 6.83) | 6.25(5.69 to 6.82) |
|              | 65-69      | 5.91(5.23 to 6.59) | 6.04(5.43 to 6.64) | 6.20(5.56 to 6.84) | 6.31(5.74 to 6.89) |
|              | 70-74      | 5.90(5.22 to 6.58) | 6.03(5.43 to 6.64) | 6.19(5.55 to 6.83) | 6.30(5.72 to 6.87) |
|              | 75-79      | 5.90(5.22 to 6.59) | 5.91(5.30 to 6.53) | 6.13(5.48 to 6.79) | 6.15(5.55 to 6.74) |
|              | 80-        | 4.97(4.24 to 5.70) | 5.15(4.52 to 5.78) | 5.35(4.66 to 6.03) | 5.51(4.90 to 6.12) |
|              |            | Age-standardised   | 5.68(5.00 to 6.37) | 5.55(4.94 to 6.16) | 5.95(5.31 to 6.59) |
| Heilongjiang | 25-29      | 5.43(4.75 to 6.10) | 5.18(4.59 to 5.78) | 5.80(5.18 to 6.41) | 5.44(4.87 to 6.00) |
|              | 30-34      | 5.51(4.83 to 6.18) | 5.29(4.69 to 5.89) | 5.76(5.14 to 6.39) | 5.65(5.10 to 6.20) |
|              | 35-39      | 5.64(4.96 to 6.31) | 5.35(4.75 to 5.94) | 5.98(5.37 to 6.58) | 5.70(5.14 to 6.26) |
|              | 40-44      | 5.72(5.04 to 6.39) | 5.49(4.89 to 6.09) | 5.97(5.37 to 6.57) | 5.73(5.19 to 6.26) |
|              | 45-49      | 5.87(5.20 to 6.55) | 5.60(5.00 to 6.20) | 6.13(5.54 to 6.73) | 5.81(5.27 to 6.34) |
|              | 50-54      | 5.98(5.30 to 6.66) | 5.70(5.10 to 6.30) | 6.18(5.59 to 6.78) | 5.91(5.38 to 6.44) |
|              | 55-59      | 6.02(5.34 to 6.70) | 5.84(5.24 to 6.45) | 6.30(5.70 to 6.90) | 6.17(5.64 to 6.71) |
|              | 60-64      | 5.97(5.29 to 6.65) | 6.01(5.41 to 6.62) | 6.34(5.74 to 6.94) | 6.22(5.69 to 6.76) |
|              | 65-69      | 6.11(5.43 to 6.79) | 6.08(5.48 to 6.68) | 6.35(5.75 to 6.95) | 6.34(5.81 to 6.88) |
|              | 70-74      | 6.09(5.41 to 6.76) | 6.09(5.49 to 6.69) | 6.29(5.69 to 6.88) | 6.36(5.83 to 6.89) |

|                  | Age, years       | 2010               |                    | 2018               |                    |
|------------------|------------------|--------------------|--------------------|--------------------|--------------------|
|                  |                  | Male               | Female             | Male               | Female             |
|                  | 75-79            | 6.25(5.56 to 6.95) | 6.08(5.48 to 6.68) | 6.06(5.47 to 6.66) | 6.32(5.79 to 6.85) |
|                  | 80-              | 5.10(4.36 to 5.84) | 5.22(4.56 to 5.88) | 5.53(4.86 to 6.21) | 5.47(4.84 to 6.09) |
|                  | Age-standardised | 5.77(5.09 to 6.45) | 5.57(4.97 to 6.17) | 6.04(5.44 to 6.65) | 5.84(5.29 to 6.38) |
| Hubei            | 25-29            | 5.31(4.62 to 6.00) | 5.11(4.50 to 5.72) | 5.49(4.83 to 6.16) | 5.22(4.66 to 5.79) |
|                  | 30-34            | 5.32(4.63 to 6.01) | 5.20(4.59 to 5.81) | 5.47(4.84 to 6.10) | 5.29(4.73 to 5.85) |
|                  | 35-39            | 5.52(4.83 to 6.21) | 5.29(4.68 to 5.90) | 5.69(5.06 to 6.31) | 5.36(4.81 to 5.91) |
|                  | 40-44            | 5.65(4.97 to 6.34) | 5.39(4.79 to 6.00) | 5.86(5.24 to 6.48) | 5.57(5.02 to 6.12) |
|                  | 45-49            | 5.85(5.17 to 6.54) | 5.59(4.99 to 6.20) | 5.93(5.31 to 6.54) | 5.64(5.09 to 6.19) |
|                  | 50-54            | 5.82(5.14 to 6.50) | 5.60(5.00 to 6.21) | 5.96(5.35 to 6.58) | 5.78(5.23 to 6.33) |
|                  | 55-59            | 5.83(5.14 to 6.51) | 5.74(5.13 to 6.34) | 6.00(5.39 to 6.62) | 5.91(5.36 to 6.46) |
|                  | 60-64            | 5.85(5.16 to 6.54) | 5.85(5.25 to 6.46) | 6.05(5.43 to 6.67) | 5.99(5.44 to 6.54) |
|                  | 65-69            | 5.90(5.21 to 6.59) | 5.97(5.36 to 6.57) | 6.03(5.42 to 6.65) | 6.05(5.50 to 6.60) |
|                  | 70-74            | 5.85(5.16 to 6.54) | 5.93(5.33 to 6.54) | 5.99(5.37 to 6.61) | 6.08(5.53 to 6.62) |
|                  | 75-79            | 5.71(5.03 to 6.40) | 5.84(5.23 to 6.45) | 5.87(5.25 to 6.49) | 5.93(5.38 to 6.48) |
|                  | 80-              | 5.04(4.33 to 5.74) | 5.13(4.48 to 5.78) | 5.03(4.33 to 5.74) | 5.29(4.68 to 5.90) |
|                  | Age-standardised | 5.63(4.94 to 6.32) | 5.48(4.87 to 6.09) | 5.79(5.16 to 6.41) | 5.60(5.04 to 6.15) |
|                  | Hunan            | 25-29              | 5.34(4.68 to 6.00) | 5.22(4.64 to 5.81) | 5.56(4.98 to 6.15) |
| 30-34            |                  | 5.39(4.74 to 6.05) | 5.30(4.71 to 5.88) | 5.55(4.95 to 6.15) | 5.41(4.90 to 5.93) |
| 35-39            |                  | 5.56(4.90 to 6.21) | 5.41(4.82 to 5.99) | 5.73(5.16 to 6.31) | 5.52(5.01 to 6.04) |
| 40-44            |                  | 5.60(4.94 to 6.26) | 5.51(4.93 to 6.10) | 5.86(5.29 to 6.43) | 5.64(5.13 to 6.16) |
| 45-49            |                  | 5.80(5.15 to 6.46) | 5.67(5.08 to 6.26) | 5.99(5.41 to 6.56) | 5.80(5.28 to 6.31) |
| 50-54            |                  | 5.80(5.14 to 6.46) | 5.73(5.14 to 6.31) | 6.06(5.49 to 6.63) | 6.02(5.50 to 6.53) |
| 55-59            |                  | 5.81(5.14 to 6.47) | 5.85(5.25 to 6.44) | 6.06(5.48 to 6.63) | 6.14(5.62 to 6.66) |
| 60-64            |                  | 5.93(5.27 to 6.60) | 5.96(5.36 to 6.55) | 6.07(5.50 to 6.64) | 6.14(5.63 to 6.66) |
| 65-69            |                  | 5.84(5.17 to 6.50) | 5.92(5.33 to 6.51) | 6.04(5.47 to 6.61) | 6.23(5.71 to 6.74) |
| 70-74            |                  | 5.88(5.20 to 6.57) | 6.03(5.41 to 6.64) | 6.02(5.44 to 6.60) | 6.21(5.68 to 6.74) |
| 75-79            |                  | 5.79(5.05 to 6.53) | 5.87(5.24 to 6.49) | 5.93(5.35 to 6.51) | 6.12(5.59 to 6.64) |
| 80-              |                  | 5.10(4.35 to 5.85) | 5.16(4.50 to 5.82) | 5.31(4.67 to 5.95) | 5.36(4.78 to 5.94) |
| Age-standardised |                  | 5.64(4.97 to 6.30) | 5.58(4.99 to 6.17) | 5.84(5.26 to 6.42) | 5.75(5.23 to 6.26) |
| Jilin            |                  | 25-29              | 5.59(4.92 to 6.27) | 5.41(4.81 to 6.01) | 5.84(5.11 to 6.56) |
|                  | 30-34            | 5.63(4.95 to 6.31) | 5.46(4.86 to 6.06) | 5.65(5.04 to 6.27) | 5.57(5.03 to 6.12) |
|                  | 35-39            | 5.77(5.09 to 6.44) | 5.47(4.87 to 6.07) | 5.82(5.22 to 6.43) | 5.54(4.99 to 6.08) |
|                  | 40-44            | 5.93(5.25 to 6.61) | 5.65(5.05 to 6.26) | 5.97(5.36 to 6.57) | 5.66(5.12 to 6.21) |
|                  | 45-49            | 6.01(5.33 to 6.69) | 5.68(5.09 to 6.28) | 6.11(5.51 to 6.72) | 5.82(5.27 to 6.36) |
|                  | 50-54            | 6.03(5.35 to 6.70) | 5.81(5.21 to 6.40) | 6.23(5.62 to 6.84) | 5.89(5.35 to 6.44) |

|          | Age, years       | 2010               |                    | 2018               |                    |
|----------|------------------|--------------------|--------------------|--------------------|--------------------|
|          |                  | Male               | Female             | Male               | Female             |
|          | 55-59            | 6.06(5.39 to 6.74) | 5.96(5.36 to 6.55) | 6.20(5.59 to 6.80) | 6.13(5.58 to 6.67) |
|          | 60-64            | 6.12(5.44 to 6.79) | 6.08(5.48 to 6.67) | 6.28(5.68 to 6.89) | 6.16(5.62 to 6.70) |
|          | 65-69            | 6.19(5.51 to 6.86) | 6.11(5.52 to 6.71) | 6.24(5.63 to 6.84) | 6.24(5.70 to 6.79) |
|          | 70-74            | 6.09(5.41 to 6.77) | 6.15(5.55 to 6.75) | 6.20(5.58 to 6.82) | 6.29(5.74 to 6.84) |
|          | 75-79            | 6.03(5.35 to 6.70) | 6.03(5.41 to 6.64) | 6.11(5.49 to 6.73) | 6.24(5.68 to 6.79) |
|          | 80-              | 5.14(4.41 to 5.86) | 5.22(4.59 to 5.84) | 5.30(4.61 to 5.99) | 5.39(4.76 to 6.01) |
|          | Age-standardised | 5.88(5.20 to 6.56) | 5.69(5.09 to 6.29) | 5.99(5.37 to 6.62) | 5.78(5.23 to 6.33) |
| Jiangsu  | 25-29            | 5.55(4.85 to 6.25) | 5.25(4.64 to 5.87) | 5.69(5.08 to 6.30) | 5.41(4.86 to 5.96) |
|          | 30-34            | 5.55(4.84 to 6.26) | 5.33(4.71 to 5.96) | 5.83(5.21 to 6.46) | 5.46(4.92 to 6.01) |
|          | 35-39            | 5.71(5.00 to 6.42) | 5.45(4.82 to 6.07) | 6.00(5.39 to 6.61) | 5.64(5.09 to 6.19) |
|          | 40-44            | 5.82(5.11 to 6.53) | 5.55(4.92 to 6.18) | 6.12(5.51 to 6.73) | 5.72(5.17 to 6.27) |
|          | 45-49            | 5.95(5.24 to 6.66) | 5.68(5.05 to 6.31) | 6.24(5.62 to 6.85) | 5.87(5.32 to 6.42) |
|          | 50-54            | 5.96(5.24 to 6.67) | 5.80(5.17 to 6.44) | 6.25(5.63 to 6.86) | 6.08(5.53 to 6.64) |
|          | 55-59            | 6.01(5.29 to 6.73) | 5.91(5.27 to 6.54) | 6.30(5.68 to 6.92) | 6.12(5.57 to 6.68) |
|          | 60-64            | 6.04(5.32 to 6.76) | 6.04(5.41 to 6.68) | 6.28(5.66 to 6.90) | 6.22(5.67 to 6.77) |
|          | 65-69            | 6.11(5.38 to 6.83) | 6.11(5.48 to 6.75) | 6.31(5.69 to 6.92) | 6.36(5.81 to 6.91) |
|          | 70-74            | 6.07(5.34 to 6.79) | 6.17(5.54 to 6.81) | 6.29(5.67 to 6.91) | 6.40(5.85 to 6.95) |
|          | 75-79            | 5.94(5.21 to 6.66) | 6.00(5.36 to 6.63) | 6.27(5.64 to 6.90) | 6.34(5.77 to 6.91) |
|          | 80-              | 5.21(4.47 to 5.94) | 5.26(4.62 to 5.90) | 5.48(4.83 to 6.13) | 5.53(4.96 to 6.09) |
|          | Age-standardised | 5.81(5.10 to 6.52) | 5.63(5.01 to 6.26) | 6.08(5.46 to 6.69) | 5.83(5.28 to 6.38) |
| Jiangxi  | 25-29            | 5.28(4.61 to 5.96) | 5.12(4.52 to 5.71) | 5.41(4.78 to 6.05) | 5.25(4.70 to 5.79) |
|          | 30-34            | 5.36(4.68 to 6.04) | 5.21(4.61 to 5.81) | 5.60(5.00 to 6.19) | 5.35(4.82 to 5.88) |
|          | 35-39            | 5.54(4.86 to 6.22) | 5.27(4.67 to 5.87) | 5.65(5.02 to 6.28) | 5.47(4.94 to 6.00) |
|          | 40-44            | 5.60(4.92 to 6.28) | 5.42(4.82 to 6.03) | 5.81(5.21 to 6.40) | 5.61(5.08 to 6.14) |
|          | 45-49            | 5.69(5.02 to 6.37) | 5.48(4.88 to 6.08) | 5.92(5.33 to 6.52) | 5.68(5.14 to 6.21) |
|          | 50-54            | 5.71(5.04 to 6.39) | 5.60(5.00 to 6.20) | 5.99(5.39 to 6.58) | 5.81(5.28 to 6.35) |
|          | 55-59            | 5.76(5.08 to 6.43) | 5.72(5.12 to 6.32) | 6.00(5.40 to 6.59) | 5.97(5.44 to 6.51) |
|          | 60-64            | 5.75(5.07 to 6.43) | 5.82(5.22 to 6.42) | 5.95(5.35 to 6.54) | 6.04(5.51 to 6.58) |
|          | 65-69            | 5.85(5.17 to 6.53) | 5.86(5.26 to 6.45) | 6.00(5.41 to 6.59) | 6.14(5.62 to 6.67) |
|          | 70-74            | 5.75(5.07 to 6.43) | 6.00(5.41 to 6.60) | 5.95(5.36 to 6.55) | 6.08(5.54 to 6.61) |
|          | 75-79            | 5.73(5.05 to 6.41) | 5.80(5.20 to 6.39) | 5.85(5.25 to 6.44) | 6.08(5.55 to 6.62) |
|          | 80-              | 5.00(4.27 to 5.73) | 5.10(4.47 to 5.73) | 5.06(4.41 to 5.71) | 5.35(4.79 to 5.92) |
|          | Age-standardised | 5.58(4.90 to 6.26) | 5.46(4.86 to 6.06) | 5.77(5.16 to 6.37) | 5.65(5.12 to 6.19) |
| Liaoning | 25-29            | 5.54(4.84 to 6.25) | 5.40(4.79 to 6.01) | 5.73(5.08 to 6.39) | 5.44(4.87 to 6.01) |
|          | 30-34            | 5.64(4.95 to 6.32) | 5.43(4.82 to 6.03) | 5.72(5.12 to 6.33) | 5.51(4.96 to 6.05) |

|                | Age, years       | 2010               |                    | 2018               |                    |
|----------------|------------------|--------------------|--------------------|--------------------|--------------------|
|                |                  | Male               | Female             | Male               | Female             |
|                | 35-39            | 5.76(5.08 to 6.44) | 5.51(4.91 to 6.11) | 5.85(5.23 to 6.46) | 5.71(5.16 to 6.26) |
|                | 40-44            | 5.90(5.21 to 6.58) | 5.65(5.05 to 6.26) | 6.04(5.42 to 6.66) | 5.70(5.15 to 6.25) |
|                | 45-49            | 5.96(5.27 to 6.65) | 5.77(5.16 to 6.38) | 6.14(5.52 to 6.75) | 5.87(5.32 to 6.42) |
|                | 50-54            | 6.06(5.37 to 6.75) | 5.86(5.25 to 6.47) | 6.24(5.63 to 6.85) | 6.07(5.52 to 6.62) |
|                | 55-59            | 6.02(5.34 to 6.71) | 6.04(5.43 to 6.64) | 6.26(5.64 to 6.87) | 6.25(5.70 to 6.80) |
|                | 60-64            | 6.06(5.38 to 6.74) | 6.13(5.53 to 6.73) | 6.33(5.72 to 6.94) | 6.32(5.77 to 6.86) |
|                | 65-69            | 6.10(5.42 to 6.78) | 6.22(5.60 to 6.84) | 6.32(5.71 to 6.94) | 6.43(5.88 to 6.99) |
|                | 70-74            | 6.11(5.41 to 6.82) | 6.24(5.61 to 6.88) | 6.29(5.67 to 6.91) | 6.40(5.84 to 6.95) |
|                | 75-79            | 5.98(5.25 to 6.70) | 6.05(5.39 to 6.70) | 6.28(5.67 to 6.90) | 6.28(5.73 to 6.83) |
|                | 80-              | 5.29(4.53 to 6.04) | 5.41(4.76 to 6.06) | 5.35(4.67 to 6.02) | 5.43(4.83 to 6.03) |
|                | Age-standardised | 5.86(5.17 to 6.55) | 5.73(5.12 to 6.34) | 6.02(5.40 to 6.65) | 5.86(5.31 to 6.41) |
| Inner Mongolia | 25-29            | 5.32(4.65 to 6.00) | 5.12(4.52 to 5.72) | 5.55(4.86 to 6.23) | 5.30(4.72 to 5.87) |
|                | 30-34            | 5.45(4.77 to 6.12) | 5.20(4.61 to 5.80) | 5.51(4.87 to 6.16) | 5.29(4.73 to 5.85) |
|                | 35-39            | 5.54(4.87 to 6.22) | 5.31(4.71 to 5.91) | 5.70(5.06 to 6.35) | 5.42(4.86 to 5.98) |
|                | 40-44            | 5.65(4.97 to 6.33) | 5.43(4.83 to 6.03) | 5.89(5.26 to 6.51) | 5.56(4.99 to 6.12) |
|                | 45-49            | 5.79(5.11 to 6.47) | 5.51(4.90 to 6.11) | 5.99(5.36 to 6.61) | 5.69(5.12 to 6.25) |
|                | 50-54            | 5.80(5.12 to 6.49) | 5.72(5.11 to 6.32) | 6.02(5.39 to 6.65) | 5.82(5.25 to 6.38) |
|                | 55-59            | 5.87(5.18 to 6.55) | 5.80(5.19 to 6.40) | 6.12(5.49 to 6.75) | 5.96(5.39 to 6.52) |
|                | 60-64            | 5.85(5.17 to 6.53) | 5.90(5.29 to 6.50) | 6.09(5.46 to 6.71) | 6.11(5.55 to 6.67) |
|                | 65-69            | 5.86(5.17 to 6.54) | 5.95(5.35 to 6.55) | 6.17(5.54 to 6.80) | 6.24(5.68 to 6.80) |
|                | 70-74            | 5.89(5.20 to 6.58) | 5.96(5.35 to 6.57) | 6.09(5.46 to 6.73) | 6.25(5.68 to 6.82) |
|                | 75-79            | 5.79(5.10 to 6.49) | 5.82(5.18 to 6.45) | 6.08(5.42 to 6.73) | 6.03(5.44 to 6.61) |
|                | 80-              | 5.03(4.26 to 5.80) | 5.08(4.41 to 5.76) | 5.32(4.66 to 5.99) | 5.21(4.61 to 5.82) |
|                | Age-standardised | 5.64(4.96 to 6.33) | 5.49(4.89 to 6.10) | 5.85(5.21 to 6.49) | 5.65(5.09 to 6.22) |
| Ningxia        | 25-29            | 5.03(4.36 to 5.70) | 4.82(4.23 to 5.42) | 5.21(4.64 to 5.78) | 5.14(4.61 to 5.67) |
|                | 30-34            | 5.12(4.45 to 5.80) | 4.88(4.28 to 5.48) | 5.33(4.76 to 5.90) | 5.15(4.64 to 5.66) |
|                | 35-39            | 5.24(4.57 to 5.90) | 5.00(4.41 to 5.59) | 5.37(4.81 to 5.93) | 5.34(4.83 to 5.84) |
|                | 40-44            | 5.36(4.70 to 6.03) | 5.11(4.52 to 5.71) | 5.57(5.01 to 6.13) | 5.36(4.85 to 5.86) |
|                | 45-49            | 5.55(4.88 to 6.22) | 5.26(4.66 to 5.85) | 5.80(5.24 to 6.37) | 5.51(5.00 to 6.02) |
|                | 50-54            | 5.55(4.88 to 6.22) | 5.34(4.74 to 5.93) | 5.67(5.11 to 6.23) | 5.57(5.06 to 6.08) |
|                | 55-59            | 5.58(4.90 to 6.26) | 5.47(4.87 to 6.07) | 5.71(5.15 to 6.27) | 5.69(5.18 to 6.20) |
|                | 60-64            | 5.61(4.93 to 6.29) | 5.63(5.03 to 6.23) | 5.82(5.26 to 6.39) | 5.81(5.30 to 6.32) |
|                | 65-69            | 5.68(4.99 to 6.36) | 5.71(5.11 to 6.31) | 5.75(5.19 to 6.32) | 5.92(5.41 to 6.43) |
|                | 70-74            | 5.62(4.95 to 6.30) | 5.89(5.29 to 6.49) | 5.72(5.16 to 6.28) | 5.93(5.42 to 6.44) |
|                | 75-79            | 5.56(4.88 to 6.23) | 5.67(5.07 to 6.27) | 5.78(5.22 to 6.34) | 5.80(5.29 to 6.31) |

|          | Age, years       | 2010               |                    | 2018               |                    |
|----------|------------------|--------------------|--------------------|--------------------|--------------------|
|          |                  | Male               | Female             | Male               | Female             |
|          | 80-              | 4.87(4.20 to 5.55) | 4.83(4.16 to 5.51) | 4.94(4.30 to 5.58) | 5.12(4.52 to 5.72) |
|          | Age-standardised | 5.37(4.70 to 6.05) | 5.21(4.61 to 5.80) | 5.55(4.98 to 6.11) | 5.46(4.94 to 5.97) |
| Qinghai  | 25-29            | 5.15(4.45 to 5.86) | 4.89(4.27 to 5.51) | 5.28(4.63 to 5.93) | 5.10(4.55 to 5.64) |
|          | 30-34            | 5.24(4.54 to 5.94) | 4.96(4.34 to 5.57) | 5.42(4.82 to 6.02) | 5.13(4.60 to 5.67) |
|          | 35-39            | 5.32(4.62 to 6.02) | 5.05(4.44 to 5.67) | 5.51(4.91 to 6.11) | 5.25(4.71 to 5.79) |
|          | 40-44            | 5.45(4.76 to 6.15) | 5.23(4.62 to 5.85) | 5.69(5.09 to 6.29) | 5.36(4.82 to 5.90) |
|          | 45-49            | 5.61(4.91 to 6.30) | 5.30(4.69 to 5.92) | 5.84(5.24 to 6.44) | 5.50(4.96 to 6.04) |
|          | 50-54            | 5.64(4.94 to 6.33) | 5.46(4.84 to 6.07) | 5.88(5.28 to 6.48) | 5.70(5.16 to 6.24) |
|          | 55-59            | 5.70(5.02 to 6.38) | 5.52(4.90 to 6.13) | 5.95(5.34 to 6.56) | 5.73(5.19 to 6.26) |
|          | 60-64            | 5.80(5.11 to 6.50) | 5.73(5.11 to 6.34) | 5.98(5.38 to 6.58) | 5.91(5.37 to 6.45) |
|          | 65-69            | 5.79(5.05 to 6.53) | 5.68(5.06 to 6.29) | 6.05(5.45 to 6.65) | 6.04(5.50 to 6.58) |
|          | 70-74            | 5.69(5.00 to 6.38) | 5.76(5.15 to 6.37) | 6.43(5.82 to 7.05) | 5.98(5.43 to 6.52) |
|          | 75-79            | 5.68(4.92 to 6.44) | 5.56(4.90 to 6.21) | 5.81(5.21 to 6.42) | 5.76(5.20 to 6.32) |
|          | 80-              | 4.92(4.15 to 5.69) | 4.86(4.19 to 5.54) | 5.45(4.78 to 6.11) | 5.00(4.37 to 5.64) |
|          | Age-standardised | 5.47(4.77 to 6.18) | 5.26(4.64 to 5.88) | 5.70(5.09 to 6.31) | 5.46(4.92 to 6.01) |
| Shandong | 25-29            | 5.45(4.79 to 6.10) | 5.22(4.63 to 5.80) | 5.58(4.98 to 6.17) | 5.28(4.75 to 5.82) |
|          | 30-34            | 5.46(4.80 to 6.11) | 5.25(4.66 to 5.83) | 5.64(5.06 to 6.23) | 5.37(4.85 to 5.90) |
|          | 35-39            | 5.62(4.96 to 6.27) | 5.40(4.82 to 5.99) | 5.83(5.24 to 6.41) | 5.58(5.05 to 6.10) |
|          | 40-44            | 5.73(5.07 to 6.39) | 5.52(4.97 to 6.07) | 5.89(5.31 to 6.47) | 5.65(5.14 to 6.16) |
|          | 45-49            | 5.84(5.18 to 6.50) | 5.64(5.06 to 6.22) | 6.04(5.46 to 6.63) | 5.72(5.20 to 6.25) |
|          | 50-54            | 5.91(5.26 to 6.57) | 5.78(5.20 to 6.36) | 6.17(5.59 to 6.75) | 5.93(5.41 to 6.46) |
|          | 55-59            | 5.85(5.19 to 6.51) | 5.86(5.28 to 6.45) | 6.22(5.63 to 6.80) | 6.03(5.51 to 6.55) |
|          | 60-64            | 5.94(5.28 to 6.61) | 6.06(5.47 to 6.65) | 6.15(5.57 to 6.73) | 6.11(5.58 to 6.63) |
|          | 65-69            | 5.98(5.32 to 6.65) | 6.07(5.49 to 6.66) | 6.17(5.59 to 6.75) | 6.24(5.72 to 6.76) |
|          | 70-74            | 5.97(5.30 to 6.65) | 6.10(5.51 to 6.68) | 6.10(5.52 to 6.68) | 6.28(5.75 to 6.80) |
|          | 75-79            | 5.84(5.16 to 6.51) | 6.05(5.44 to 6.65) | 5.99(5.41 to 6.57) | 6.13(5.60 to 6.67) |
|          | 80-              | 5.07(4.36 to 5.78) | 5.23(4.63 to 5.84) | 5.26(4.63 to 5.89) | 5.23(4.64 to 5.81) |
|          | Age-standardised | 5.71(5.05 to 6.37) | 5.60(5.01 to 6.18) | 5.91(5.33 to 6.50) | 5.72(5.19 to 6.24) |
| Shanxi   | 25-29            | 5.37(4.70 to 6.03) | 5.22(4.63 to 5.81) | 5.52(4.88 to 6.17) | 5.27(4.71 to 5.84) |
|          | 30-34            | 5.41(4.74 to 6.07) | 5.27(4.68 to 5.86) | 5.64(4.99 to 6.28) | 5.37(4.81 to 5.93) |
|          | 35-39            | 5.57(4.91 to 6.23) | 5.40(4.81 to 5.98) | 5.82(5.18 to 6.46) | 5.50(4.94 to 6.06) |
|          | 40-44            | 5.76(5.09 to 6.42) | 5.51(4.92 to 6.10) | 5.80(5.18 to 6.43) | 5.58(5.02 to 6.14) |
|          | 45-49            | 5.84(5.18 to 6.51) | 5.60(5.01 to 6.19) | 5.98(5.35 to 6.61) | 5.67(5.11 to 6.23) |
|          | 50-54            | 5.92(5.26 to 6.59) | 5.70(5.11 to 6.29) | 6.08(5.45 to 6.70) | 5.83(5.27 to 6.39) |
|          | 55-59            | 5.83(5.17 to 6.49) | 5.79(5.20 to 6.38) | 6.10(5.48 to 6.73) | 6.01(5.45 to 6.57) |



|          | Age, years       | 2010               |                    | 2018               |                    |
|----------|------------------|--------------------|--------------------|--------------------|--------------------|
|          |                  | Male               | Female             | Male               | Female             |
|          | 60-64            | 5.82(5.16 to 6.48) | 5.94(5.35 to 6.53) | 6.05(5.42 to 6.67) | 6.02(5.45 to 6.58) |
|          | 65-69            | 5.95(5.29 to 6.61) | 6.06(5.47 to 6.65) | 6.19(5.56 to 6.81) | 6.18(5.62 to 6.74) |
|          | 70-74            | 5.91(5.24 to 6.57) | 6.06(5.47 to 6.65) | 6.12(5.50 to 6.75) | 6.25(5.68 to 6.81) |
|          | 75-79            | 5.91(5.21 to 6.61) | 5.85(5.23 to 6.47) | 6.08(5.45 to 6.71) | 6.05(5.49 to 6.60) |
|          | 80-              | 5.09(4.32 to 5.86) | 5.30(4.65 to 5.95) | 5.21(4.54 to 5.89) | 5.33(4.70 to 5.95) |
|          | Age-standardised | 5.68(5.02 to 6.35) | 5.56(4.97 to 6.15) | 5.86(5.23 to 6.50) | 5.67(5.10 to 6.23) |
| Shaanxi  | 25-29            | 4.98(4.25 to 5.72) | 4.84(4.19 to 5.48) | 5.33(4.67 to 5.98) | 5.12(4.56 to 5.69) |
|          | 30-34            | 5.00(4.27 to 5.74) | 4.87(4.22 to 5.51) | 5.37(4.73 to 6.00) | 5.20(4.63 to 5.76) |
|          | 35-39            | 5.12(4.39 to 5.85) | 4.98(4.34 to 5.62) | 5.46(4.83 to 6.09) | 5.30(4.73 to 5.86) |
|          | 40-44            | 5.27(4.54 to 6.00) | 5.10(4.46 to 5.75) | 5.57(4.94 to 6.19) | 5.46(4.90 to 6.02) |
|          | 45-49            | 5.38(4.65 to 6.11) | 5.22(4.58 to 5.86) | 5.66(5.03 to 6.29) | 5.48(4.92 to 6.04) |
|          | 50-54            | 5.43(4.70 to 6.15) | 5.32(4.68 to 5.96) | 5.76(5.13 to 6.39) | 5.64(5.07 to 6.20) |
|          | 55-59            | 5.45(4.73 to 6.18) | 5.42(4.78 to 6.06) | 5.83(5.20 to 6.46) | 5.77(5.20 to 6.33) |
|          | 60-64            | 5.47(4.74 to 6.19) | 5.55(4.91 to 6.19) | 5.82(5.19 to 6.45) | 5.81(5.25 to 6.37) |
|          | 65-69            | 5.52(4.79 to 6.24) | 5.58(4.94 to 6.22) | 5.75(5.12 to 6.38) | 5.92(5.36 to 6.49) |
|          | 70-74            | 5.50(4.77 to 6.22) | 5.69(5.05 to 6.33) | 5.80(5.16 to 6.43) | 5.97(5.40 to 6.54) |
|          | 75-79            | 5.38(4.65 to 6.11) | 5.51(4.86 to 6.16) | 5.75(5.11 to 6.39) | 5.85(5.27 to 6.43) |
|          | 80-              | 4.72(3.98 to 5.46) | 4.85(4.19 to 5.50) | 5.04(4.34 to 5.75) | 5.16(4.55 to 5.77) |
|          | Age-standardised | 5.25(4.52 to 5.98) | 5.17(4.53 to 5.81) | 5.58(4.94 to 6.21) | 5.48(4.91 to 6.04) |
| Shanghai | 25-29            | 5.52(4.79 to 6.26) | 5.16(4.52 to 5.80) | 5.58(4.90 to 6.26) | 5.26(4.67 to 5.84) |
|          | 30-34            | 5.58(4.85 to 6.31) | 5.23(4.59 to 5.88) | 5.65(5.06 to 6.25) | 5.38(4.85 to 5.91) |
|          | 35-39            | 5.76(5.03 to 6.49) | 5.34(4.70 to 5.98) | 5.79(5.19 to 6.39) | 5.42(4.89 to 5.96) |
|          | 40-44            | 5.84(5.11 to 6.58) | 5.45(4.80 to 6.09) | 5.97(5.37 to 6.57) | 5.55(5.01 to 6.09) |
|          | 45-49            | 5.97(5.24 to 6.71) | 5.58(4.94 to 6.23) | 5.96(5.36 to 6.56) | 5.81(5.27 to 6.35) |
|          | 50-54            | 6.02(5.27 to 6.76) | 5.70(5.05 to 6.36) | 6.16(5.56 to 6.77) | 5.78(5.24 to 6.32) |
|          | 55-59            | 6.04(5.30 to 6.78) | 5.87(5.22 to 6.52) | 6.26(5.65 to 6.86) | 6.02(5.47 to 6.56) |
|          | 60-64            | 6.11(5.37 to 6.85) | 5.97(5.32 to 6.62) | 6.30(5.69 to 6.90) | 6.16(5.62 to 6.70) |
|          | 65-69            | 6.17(5.43 to 6.92) | 6.10(5.45 to 6.75) | 6.29(5.68 to 6.90) | 6.27(5.72 to 6.82) |
|          | 70-74            | 6.18(5.44 to 6.93) | 6.15(5.50 to 6.80) | 6.36(5.75 to 6.97) | 6.36(5.81 to 6.91) |
|          | 75-79            | 6.10(5.35 to 6.84) | 6.00(5.35 to 6.65) | 6.31(5.70 to 6.92) | 6.37(5.83 to 6.92) |
|          | 80-              | 5.33(4.57 to 6.09) | 5.28(4.63 to 5.94) | 5.62(4.99 to 6.25) | 5.61(5.05 to 6.16) |
|          | Age-standardised | 5.85(5.12 to 6.59) | 5.55(4.91 to 6.20) | 5.95(5.34 to 6.57) | 5.70(5.16 to 6.25) |
| Sichuan  | 25-29            | 5.31(4.64 to 5.99) | 5.16(4.57 to 5.76) | 5.49(4.82 to 6.15) | 5.29(4.73 to 5.85) |
|          | 30-34            | 5.35(4.67 to 6.04) | 5.23(4.62 to 5.83) | 5.55(4.92 to 6.18) | 5.33(4.77 to 5.88) |
|          | 35-39            | 5.48(4.79 to 6.16) | 5.33(4.72 to 5.93) | 5.68(5.06 to 6.29) | 5.52(4.98 to 6.07) |

|         | Age, years       | 2010               |                    | 2018               |                    |
|---------|------------------|--------------------|--------------------|--------------------|--------------------|
|         |                  | Male               | Female             | Male               | Female             |
|         | 40-44            | 5.64(4.96 to 6.32) | 5.44(4.83 to 6.05) | 5.81(5.20 to 6.42) | 5.62(5.07 to 6.16) |
|         | 45-49            | 5.79(5.11 to 6.48) | 5.57(4.96 to 6.18) | 6.03(5.42 to 6.64) | 5.72(5.18 to 6.27) |
|         | 50-54            | 5.80(5.11 to 6.48) | 5.68(5.07 to 6.29) | 5.98(5.37 to 6.59) | 5.86(5.32 to 6.41) |
|         | 55-59            | 5.81(5.12 to 6.50) | 5.80(5.19 to 6.41) | 6.03(5.43 to 6.63) | 6.00(5.46 to 6.54) |
|         | 60-64            | 5.80(5.11 to 6.49) | 5.83(5.22 to 6.44) | 5.97(5.37 to 6.57) | 6.08(5.54 to 6.62) |
|         | 65-69            | 5.92(5.23 to 6.61) | 5.91(5.30 to 6.52) | 6.04(5.44 to 6.64) | 6.16(5.62 to 6.70) |
|         | 70-74            | 5.87(5.18 to 6.56) | 6.01(5.40 to 6.62) | 6.08(5.48 to 6.68) | 6.20(5.66 to 6.74) |
|         | 75-79            | 5.75(5.04 to 6.47) | 5.79(5.18 to 6.41) | 5.95(5.34 to 6.55) | 6.05(5.50 to 6.59) |
|         | 80-              | 5.01(4.30 to 5.73) | 5.04(4.43 to 5.66) | 5.33(4.69 to 5.96) | 5.35(4.79 to 5.91) |
|         | Age-standardised | 5.62(4.93 to 6.30) | 5.51(4.90 to 6.11) | 5.81(5.19 to 6.43) | 5.68(5.14 to 6.23) |
| Tianjin | 25-29            | 5.60(4.87 to 6.33) | 5.36(4.72 to 6.01) | 5.84(5.22 to 6.46) | 5.42(4.90 to 5.95) |
|         | 30-34            | 5.61(4.87 to 6.34) | 5.38(4.74 to 6.02) | 5.80(5.21 to 6.38) | 5.44(4.92 to 5.97) |
|         | 35-39            | 5.74(5.00 to 6.47) | 5.50(4.86 to 6.15) | 5.91(5.31 to 6.51) | 5.54(5.01 to 6.07) |
|         | 40-44            | 5.89(5.17 to 6.62) | 5.61(4.97 to 6.25) | 6.19(5.59 to 6.79) | 5.70(5.17 to 6.23) |
|         | 45-49            | 5.98(5.26 to 6.71) | 5.74(5.10 to 6.37) | 6.08(5.50 to 6.66) | 5.85(5.33 to 6.37) |
|         | 50-54            | 6.04(5.32 to 6.76) | 5.91(5.28 to 6.55) | 6.15(5.57 to 6.73) | 5.98(5.46 to 6.50) |
|         | 55-59            | 6.07(5.35 to 6.79) | 6.01(5.38 to 6.65) | 6.45(5.87 to 7.03) | 6.08(5.55 to 6.60) |
|         | 60-64            | 6.13(5.41 to 6.86) | 6.12(5.49 to 6.76) | 6.29(5.71 to 6.87) | 6.37(5.85 to 6.90) |
|         | 65-69            | 6.25(5.53 to 6.98) | 6.19(5.56 to 6.83) | 6.41(5.83 to 6.99) | 6.33(5.81 to 6.85) |
|         | 70-74            | 6.12(5.40 to 6.84) | 6.25(5.62 to 6.88) | 6.37(5.79 to 6.94) | 6.43(5.91 to 6.94) |
|         | 75-79            | 6.22(5.50 to 6.94) | 6.06(5.43 to 6.70) | 6.24(5.67 to 6.81) | 6.42(5.91 to 6.93) |
|         | 80-              | 5.28(4.56 to 6.00) | 5.43(4.80 to 6.06) | 5.52(4.83 to 6.20) | 5.48(4.89 to 6.07) |
|         | Age-standardised | 5.88(5.15 to 6.61) | 5.71(5.07 to 6.35) | 6.08(5.49 to 6.67) | 5.81(5.28 to 6.33) |
| Tibet   | 25-29            | 4.63(4.01 to 5.25) | 4.52(3.96 to 5.07) | 4.69(4.11 to 5.28) | 4.58(4.05 to 5.11) |
|         | 30-34            | 4.67(4.05 to 5.28) | 4.57(4.02 to 5.12) | 4.82(4.24 to 5.40) | 4.66(4.14 to 5.18) |
|         | 35-39            | 4.94(4.33 to 5.56) | 4.69(4.14 to 5.24) | 4.83(4.25 to 5.41) | 4.77(4.25 to 5.29) |
|         | 40-44            | 4.98(4.36 to 5.60) | 4.76(4.21 to 5.32) | 5.22(4.63 to 5.80) | 4.90(4.38 to 5.42) |
|         | 45-49            | 5.12(4.50 to 5.74) | 4.91(4.35 to 5.46) | 5.29(4.70 to 5.87) | 4.96(4.43 to 5.48) |
|         | 50-54            | 5.30(4.67 to 5.92) | 4.93(4.37 to 5.48) | 5.19(4.60 to 5.77) | 5.00(4.48 to 5.53) |
|         | 55-59            | 5.21(4.59 to 5.83) | 5.05(4.49 to 5.60) | 5.26(4.68 to 5.84) | 5.12(4.60 to 5.65) |
|         | 60-64            | 5.16(4.54 to 5.78) | 5.09(4.53 to 5.64) | 5.32(4.73 to 5.91) | 5.15(4.62 to 5.68) |
|         | 65-69            | 5.35(4.73 to 5.97) | 5.04(4.48 to 5.60) | 5.26(4.68 to 5.84) | 5.25(4.72 to 5.78) |
|         | 70-74            | 5.13(4.49 to 5.76) | 5.22(4.66 to 5.79) | 5.22(4.63 to 5.80) | 5.29(4.65 to 5.93) |
|         | 75-79            | 5.03(4.34 to 5.71) | 4.95(4.38 to 5.52) | 5.31(4.56 to 6.06) | 5.29(4.64 to 5.95) |
|         | 80-              | 4.39(3.62 to 5.16) | 4.33(3.68 to 4.99) | 4.54(3.77 to 5.31) | 4.50(3.83 to 5.18) |
|         | Age-             | 4.98(4.36 to 5.61) | 4.81(4.25 to 5.36) | 5.06(4.47 to 5.66) | 4.90(4.36 to 5.44) |

|          | Age, years       | 2010               |                    | 2018               |                    |
|----------|------------------|--------------------|--------------------|--------------------|--------------------|
|          |                  | Male               | Female             | Male               | Female             |
|          | standardised     |                    |                    |                    |                    |
| Xinjiang | 25-29            | 5.29(4.63 to 5.94) | 5.08(4.50 to 5.66) | 5.39(4.75 to 6.03) | 5.19(4.64 to 5.75) |
|          | 30-34            | 5.22(4.55 to 5.89) | 5.18(4.59 to 5.77) | 5.47(4.84 to 6.10) | 5.29(4.72 to 5.86) |
|          | 35-39            | 5.40(4.72 to 6.09) | 5.29(4.69 to 5.89) | 5.74(5.10 to 6.38) | 5.42(4.85 to 5.99) |
|          | 40-44            | 5.56(4.87 to 6.25) | 5.40(4.80 to 6.01) | 5.77(5.14 to 6.41) | 5.50(4.93 to 6.07) |
|          | 45-49            | 5.68(5.00 to 6.37) | 5.57(4.96 to 6.17) | 5.88(5.24 to 6.52) | 5.67(5.10 to 6.24) |
|          | 50-54            | 5.72(5.04 to 6.40) | 5.70(5.10 to 6.30) | 5.90(5.27 to 6.54) | 5.85(5.29 to 6.42) |
|          | 55-59            | 5.74(5.06 to 6.41) | 5.76(5.16 to 6.36) | 6.01(5.38 to 6.64) | 5.92(5.35 to 6.48) |
|          | 60-64            | 5.76(5.09 to 6.43) | 5.91(5.31 to 6.51) | 6.09(5.47 to 6.71) | 6.09(5.52 to 6.65) |
|          | 65-69            | 5.94(5.26 to 6.62) | 5.95(5.35 to 6.56) | 6.16(5.53 to 6.79) | 6.20(5.62 to 6.77) |
|          | 70-74            | 5.94(5.25 to 6.63) | 6.15(5.53 to 6.76) | 6.07(5.43 to 6.72) | 6.16(5.59 to 6.74) |
|          | 75-79            | 5.78(5.08 to 6.48) | 5.84(5.24 to 6.45) | 5.93(5.27 to 6.60) | 6.17(5.58 to 6.76) |
|          | 80-              | 4.94(4.21 to 5.67) | 5.03(4.40 to 5.65) | 5.08(4.40 to 5.77) | 5.34(4.70 to 5.97) |
|          | Age-standardised | 5.55(4.87 to 6.23) | 5.49(4.89 to 6.09) | 5.77(5.13 to 6.41) | 5.63(5.06 to 6.19) |
| Yunnan   | 25-29            | 5.08(4.39 to 5.76) | 4.95(4.34 to 5.56) | 5.15(4.54 to 5.77) | 5.06(4.51 to 5.61) |
|          | 30-34            | 5.13(4.45 to 5.82) | 5.01(4.41 to 5.62) | 5.27(4.66 to 5.88) | 5.14(4.59 to 5.69) |
|          | 35-39            | 5.25(4.57 to 5.94) | 5.11(4.51 to 5.72) | 5.37(4.76 to 5.97) | 5.27(4.73 to 5.81) |
|          | 40-44            | 5.38(4.70 to 6.07) | 5.21(4.61 to 5.82) | 5.48(4.88 to 6.09) | 5.35(4.81 to 5.90) |
|          | 45-49            | 5.52(4.83 to 6.21) | 5.36(4.75 to 5.97) | 5.57(4.96 to 6.17) | 5.46(4.92 to 6.01) |
|          | 50-54            | 5.55(4.86 to 6.25) | 5.42(4.81 to 6.03) | 5.62(5.01 to 6.23) | 5.58(5.04 to 6.13) |
|          | 55-59            | 5.50(4.81 to 6.18) | 5.54(4.93 to 6.15) | 5.69(5.08 to 6.29) | 5.70(5.15 to 6.24) |
|          | 60-64            | 5.54(4.86 to 6.22) | 5.55(4.94 to 6.15) | 5.65(5.05 to 6.26) | 5.71(5.17 to 6.25) |
|          | 65-69            | 5.56(4.87 to 6.24) | 5.62(5.01 to 6.22) | 5.66(5.06 to 6.26) | 5.81(5.27 to 6.35) |
|          | 70-74            | 5.49(4.80 to 6.18) | 5.76(5.15 to 6.38) | 5.65(5.04 to 6.26) | 5.84(5.30 to 6.39) |
|          | 75-79            | 5.49(4.81 to 6.18) | 5.63(5.01 to 6.25) | 5.60(4.99 to 6.20) | 5.75(5.21 to 6.30) |
|          | 80-              | 4.80(4.08 to 5.52) | 4.87(4.22 to 5.52) | 4.96(4.30 to 5.62) | 4.91(4.32 to 5.50) |
|          | Age-standardised | 5.35(4.67 to 6.04) | 5.28(4.67 to 5.88) | 5.46(4.85 to 6.07) | 5.41(4.86 to 5.96) |
| Zhejiang | 25-29            | 5.22(4.52 to 5.93) | 5.08(4.45 to 5.70) | 5.52(4.87 to 6.17) | 5.24(4.67 to 5.81) |
|          | 30-34            | 5.26(4.56 to 5.97) | 5.14(4.52 to 5.76) | 5.54(4.89 to 6.19) | 5.29(4.72 to 5.87) |
|          | 35-39            | 5.43(4.73 to 6.14) | 5.24(4.62 to 5.87) | 5.62(4.98 to 6.27) | 5.41(4.84 to 5.98) |
|          | 40-44            | 5.52(4.82 to 6.23) | 5.35(4.73 to 5.97) | 5.71(5.06 to 6.35) | 5.50(4.93 to 6.07) |
|          | 45-49            | 5.66(4.97 to 6.36) | 5.48(4.86 to 6.10) | 5.91(5.27 to 6.55) | 5.67(5.10 to 6.23) |
|          | 50-54            | 5.68(4.98 to 6.38) | 5.58(4.96 to 6.20) | 5.96(5.33 to 6.60) | 5.80(5.23 to 6.36) |
|          | 55-59            | 5.71(5.02 to 6.41) | 5.73(5.11 to 6.34) | 6.00(5.37 to 6.63) | 5.99(5.43 to 6.56) |
|          | 60-64            | 5.74(5.04 to 6.43) | 5.86(5.25 to 6.48) | 6.00(5.37 to 6.63) | 6.07(5.51 to 6.63) |
|          | 65-69            | 5.82(5.12 to 6.52) | 5.94(5.32 to 6.56) | 6.06(5.43 to 6.69) | 6.16(5.59 to 6.72) |

|           | Age, years       | 2010               |                    | 2018               |                    |                    |
|-----------|------------------|--------------------|--------------------|--------------------|--------------------|--------------------|
|           |                  | Male               | Female             | Male               | Female             |                    |
|           | 70-74            | 5.75(5.05 to 6.44) | 5.99(5.37 to 6.60) | 5.97(5.34 to 6.61) | 6.18(5.61 to 6.75) |                    |
|           | 75-79            | 5.64(4.95 to 6.33) | 5.81(5.20 to 6.43) | 6.00(5.36 to 6.63) | 6.15(5.58 to 6.72) |                    |
|           | 80-              | 4.87(4.15 to 5.60) | 5.11(4.47 to 5.75) | 5.19(4.55 to 5.82) | 5.46(4.90 to 6.03) |                    |
|           | Age-standardised | 5.52(4.82 to 6.22) | 5.44(4.82 to 6.06) | 5.77(5.13 to 6.41) | 5.63(5.07 to 6.20) |                    |
| Chongqing | 25-29            | 5.32(4.60 to 6.04) | 5.17(4.54 to 5.81) | 5.43(4.75 to 6.10) | 5.24(4.67 to 5.81) |                    |
|           | 30-34            | 5.35(4.63 to 6.06) | 5.25(4.62 to 5.88) | 5.49(4.81 to 6.17) | 5.27(4.70 to 5.83) |                    |
|           | 35-39            | 5.51(4.80 to 6.23) | 5.33(4.70 to 5.96) | 5.56(4.93 to 6.19) | 5.40(4.86 to 5.94) |                    |
|           | 40-44            | 5.60(4.89 to 6.32) | 5.43(4.80 to 6.06) | 5.71(5.11 to 6.32) | 5.53(4.99 to 6.07) |                    |
|           | 45-49            | 5.75(5.04 to 6.47) | 5.58(4.95 to 6.21) | 5.91(5.30 to 6.51) | 5.69(5.14 to 6.23) |                    |
|           | 50-54            | 5.78(5.07 to 6.50) | 5.73(5.10 to 6.36) | 5.92(5.31 to 6.54) | 5.82(5.27 to 6.37) |                    |
|           | 55-59            | 5.84(5.12 to 6.55) | 5.74(5.11 to 6.37) | 5.90(5.29 to 6.51) | 5.96(5.42 to 6.51) |                    |
|           | 60-64            | 5.79(5.07 to 6.50) | 5.91(5.28 to 6.53) | 5.94(5.33 to 6.55) | 6.14(5.59 to 6.69) |                    |
|           | 65-69            | 5.85(5.14 to 6.57) | 6.01(5.38 to 6.64) | 6.01(5.40 to 6.62) | 6.14(5.59 to 6.69) |                    |
|           | 70-74            | 5.84(5.13 to 6.56) | 5.97(5.34 to 6.60) | 6.00(5.39 to 6.60) | 6.06(5.51 to 6.60) |                    |
|           | 75-79            | 5.76(5.04 to 6.47) | 5.80(5.16 to 6.43) | 5.87(5.27 to 6.47) | 6.12(5.57 to 6.66) |                    |
|           | 80-              | 4.90(4.18 to 5.62) | 5.05(4.42 to 5.69) | 5.22(4.59 to 5.85) | 5.26(4.70 to 5.83) |                    |
|           |                  | Age-standardised   | 5.60(4.89 to 6.32) | 5.52(4.89 to 6.15) | 5.73(5.10 to 6.35) | 5.63(5.08 to 6.18) |
